# Supplementary material for: OCT Amplitude and Speckle Statistics of Discrete Random Media
Source: PubMed Central journal article supplement (PMC5665955; doi:10.1038/s41598-017-14115-3), 2017-11-01
Supplement: 41598_2017_14115_MOESM1_ESM.pdf [file 41598_2017_14115_MOESM1_ESM.pdf]

1  
2  
3  
4  
5  
6  
7  
8  
9  
10  
11  
12  
13  
14  
15  
16

**OCT Amplitude and Speckle Statistics of Discrete Random Media**

**Mitra Almasian,<sup>a</sup> Ton G. van Leeuwen,<sup>a</sup> Dirk J. Faber<sup>a\*</sup>**

**d.j.faber@amc.uva.nl**

Academic Medical Center, University of Amsterdam, Department of Biomedical Engineering and Physics,  
Amsterdam, The Netherlands

**SUPPLEMENTARY INFORMATION**

17 **I – OCT geometry and signal**

18 Consider a medium containing hard spheres of a single size, where the position of the  $i$ 'th particle is given  
 19 by  $\delta(\mathbf{r} - \mathbf{r}_i)$ ; measured from a given reference particle (see Figure SI-1 below). These spheres can touch,  
 20 but not overlap in space. This medium is imaged using an OCT system with the reference arm length  
 21 ('zero delay' matched to the position of a reference particle located at depth  $z_b$  below the boundary. The  
 22 scattered light is collected at the lens in the detection arm, with  $R$  the distance between reference particle  
 23 and lens.

24

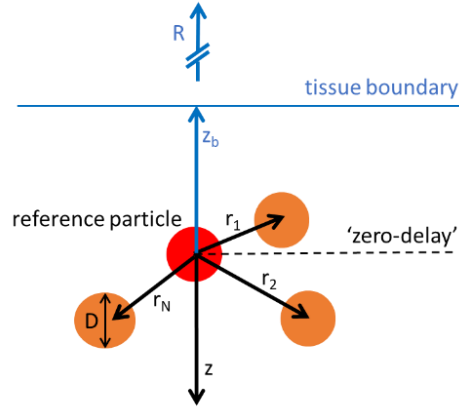

25

26 *Figure SI-1: OCT geometry. The optical path length in the reference arm is matched to*  
 27 *the position of a reference particle in the sample ('zero delay'). The sample consists of*  
 28 *identical randomly placed spheres with position  $\mathbf{r}_i$  with respect to the reference particle.*  
 29 *The distance  $R$  is between the reference particle and the detection lens in the sample arm.*

30

31 The (complex) scattered field from a volume containing  $N$  particles is given by  $E_s = \sum_{i=1}^N E_i$ . For  
 32 identical particles (equal size and refractive index), the scattering efficiency of the individual particles is  
 33 the equal, but the amplitudes and phases of the scattered fields depend on the individual particle positions.  
 34 The total field at the detector is given by  $E_D = E_R + \sum_{i=1}^N E_i$  where  $E_R$  is the field scattered from the  
 35 reference mirror (phase-matched to the reference particle).

36 The real part of the (Time-Domain) OCT signal as function of depth  $x(z)$  is obtained from the detector  
 37 current

38 
$$i_{DET}(z) \propto \langle |E_D|^2 \rangle = I_S(z) + I_R(z) + 2\langle E_R \sum_{i=1}^N E_i \rangle \quad (1a)$$

39 
$$x(z) \propto \langle E_R \sum_{i=1}^N E_i \rangle \quad (1b)$$

40 where the brackets denote averaging over the detector response time.  $I_S$  and  $I_R$  are intensities from sample  
 41 and reference arm, respectively. Removing these DC-terms yields  $x(z)$  as a cosine-modulated signal with  
 42 zero-mean and non-zero variance that encodes the sample reflectivity. The imaginary part  $y(z)$  is sine-  
 43 modulated at the same frequency. In OCT, conventionally the amplitude  $A(z) = \sqrt{x^2(z) + y^2(z)}$  is  
 44 plotted in a logarithmic grayscale image. Both mean and variance of  $A(z)$  are non-zero.

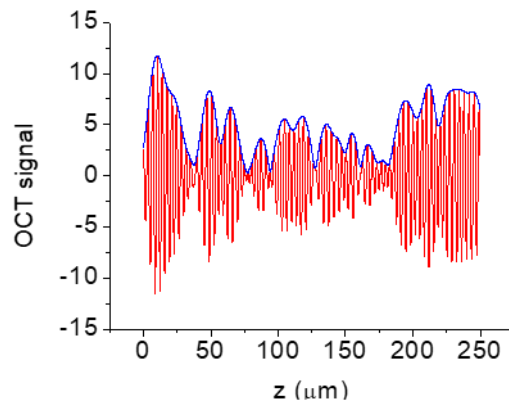

45

46 *Figure SI-2: simulated OCT signal as function of depth of a sample containing many*  
 47 *randomly placed reflectors. The red curve shows the real part  $x(z)$  of the complex OCT*  
 48 *signal, cosine modulated with zero mean and non-zero variance. The imaginary part  $y(z)$*   
 49 *is not shown. The blue curve shows the amplitude  $A(z)$ .*

50 Figure SI-2 shows simulations of  $x(z)$ , red curve, and  $A(z)$ , blue curve, from a sample containing many  
 51 identical, randomly placed reflectors ( $N > 10$ , see SI-IV). The number of reflectors is too high to resolve  
 52 their individual positions: the information about particle density and scattering strength is encoded in the  
 53 variance of  $x(z)$ , and mean and variance of  $A(z)$ .

54

55 **II – Time Domain vs. Spectral domain OCT**

56 The analysis in SI-I assumed detection of the OCT signal in the spatial domain (e.g. “Time-domain  
57 OCT”) rather than in the spatial frequency domain (Spectral domain OCT). The analysis however,  
58 remains the same because the time-domain and spectral domain signal are reversibly connected through a  
59 Fourier transformation. To illustrate, Figure SI-3A shows a simulated ‘raw spectrum’ corresponding to a  
60 single reflector, i.e. a cosine modulated in source spectrum with the position of the reflector encoded in  
61 the modulation frequency (a real signal). The result of the Fourier transform of this raw spectrum is  
62 complex. Panel B shows the result if the real part of the complex FT is calculated the signal  
63 corresponding to the red curve is obtained; if the amplitude of the complex FT is calculated the envelope  
64 (blue curve) is obtained. Note that in practice, the square of the amplitude is often calculated directly from  
65 the Power Spectrum of the raw spectrum instead of via FT; and  $\log(A^2)$  is converted to a grayscale image.

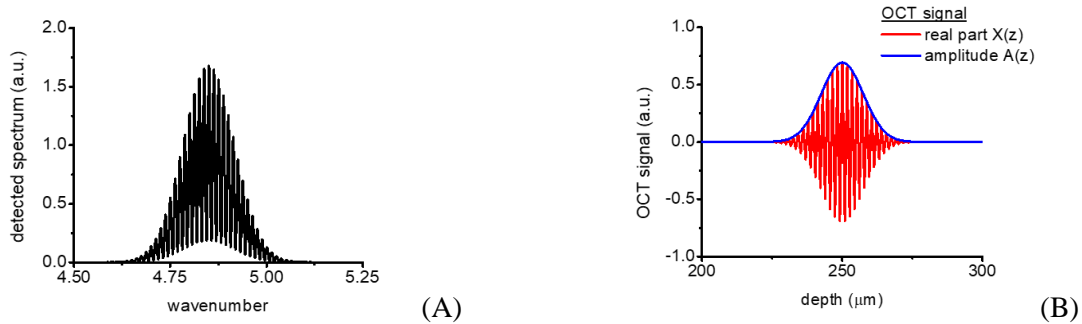

66 *Figure SI-3: (A) Simulated raw spectrum in Spectral Domain OCT corresponding to a*  
67 *single reflector. (B) The Fourier transform of this spectrum yields a complex signal with*  
68 *real part  $x(z)$ , red curve and amplitude  $A(z)$ , blue curve.*

69

70 **III – OCT Speckle**

71 The (complex) scattered field from a volume containing  $N$  particles is written as  $E_s = \sum_{i=1}^N E_i$ . Both the  
 72 amplitude and phase of  $E_i$  can be considered as random variables with no dependency on each other.  
 73 Therefore, the statistics of the scattered field and according to Supplementary Eq. 1B,  $x(z)$  follow that of a  
 74 random phasor sum as is commonly found in speckle phenomena.<sup>1</sup> Indeed, the random amplitudes and  
 75 phases of the different scattering elements within a detection volume give rise to the static speckle pattern  
 76 found in OCT images. For a large number of scatterers  $x(z)$  and  $y(z)$  follow a normal distribution (by the  
 77 Central Limit theorem) with zero mean and non-zero variance. The amplitude  $A(z) = \sqrt{x^2(z) + y^2(z)}$  is  
 78 Rayleigh distributed (Supplementary Eq. 2A) with mean  $\langle A \rangle$  and variance  $\sigma_A^2$  determined by the variance  
 79 of the underlying real and imaginary components  $\sigma_x^2 = \sigma_y^2 = \sigma_{x,y}^2$  (Supplementary Eq. 2B):

80 
$$p(A) = \frac{A}{\sigma^2} e^{-A^2/\sigma_A^2} \quad (2A)$$

81 
$$\langle A \rangle = \sqrt{\frac{\pi}{2}} \sigma_{x,y}; \quad \sigma_A^2 = \left(2 - \frac{\pi}{2}\right) \sigma_{x,y}^2 \quad (2B)$$

82 This also yields the familiar result that contrast in OCT, when defined as the ratio of the standard  
 83 deviation over the amplitude of the OCT signal is  $\sqrt{4/\pi - 1} \approx 0.52$ .<sup>2,3</sup>

84 Note that when the OCT envelope is calculated as the power spectrum of a signal acquired in the spatial  
 85 frequency domain, the distribution of this signal  $p(P)$  follows an exponential distribution, and the contrast  
 86 is unity (see SI-II).

87

88 **IV – the real part of the OCT signal  $x(z)$**

89 The information about particle density and particle scattering strength is encoded in the variance of  $x(z)$ ,  
 90 see SI-I, and via Supplementary Eq. 2B also in the mean and variance of the OCT amplitude  $A(z)$ . In  
 91 order to express  $\langle A \rangle$  and  $\sigma_A^2$  in terms of sample scattering properties, we first derive an expression for  $x(z)$   
 92 that can be used to calculate  $\sigma_x^2$  around the position of the reference particle:

93 
$$\sigma_x^2 \equiv \langle x^2(z) \rangle - \langle x(z) \rangle^2 = \langle x^2(z) \rangle \quad (3)$$

94 The last equality holds because for discrete random media, the mean of  $x(z)$  is zero. We assume N  
 95 identical particles in the probe volume, where the scattered field in the far field of the n'th particle can be  
 96 written as<sup>4</sup>:

97 
$$E_{s,n} = E_{in} \frac{f(\theta,\varphi)}{kR} e^{i\phi_n} \quad (4)$$

98 Where  $E_{in}$  is the input field which we assume identical for each particle under the 1<sup>st</sup> Born approximation;  
 99  $f(\theta,\varphi)$  is the *scattering amplitude* of the particles (in general a complex number),  $\phi_n$  is the phase of the  
 100 scattered field which depends on the position of the particle,  $k$  is the wavenumber  $k=2\pi/\lambda$  where  $\lambda$  is the  
 101 wavelength; and  $R$  is the distance to point of evaluation. Since the distances between the particles is much  
 102 smaller than the distance from the reference particle to the lens (See SI-I and Figure SI-1) we take  
 103 identical  $R$  for all particles.

104 In the following, we express the phase of the scattered field with respect to the reference particle. The  
 105 phase difference between fields scattered from 2 arbitrary particles can be written as  $\Delta\phi = \mathbf{q} \cdot \mathbf{r}$  where  $\mathbf{q}$  is  
 106 the wavevector  $\mathbf{k}_{out} - \mathbf{k}_{in}$ ,  $|\mathbf{q}| = 2k\sin\frac{1}{2}\theta$  with  $\theta$  the scattering angle (angle of observation); and  $\mathbf{r}$  is the  
 107 vector connecting both particles. Consequently, for the n'th particle we write  $\phi_n = \mathbf{q} \cdot \mathbf{r}_n$  and the computed  
 108 value of  $x$  is assigned to  $z_b$  (the position of the reference particle).

109 Since the reference particle is matched to the reference arm,  $\mathbf{q} \cdot \mathbf{r}_n$  also equals the phase difference between  
 110 the scattered field and the reference arm field. This allows us to express the relative contribution of the  
 111 field scattered from n'th particle through the complex coherence function  $\gamma(\mathbf{q} \cdot \mathbf{r}_n)$ . For an example of the  
 112 real part of the complex coherence function see Figure SI-3B.

113 Finally, the scattered field contribution needs to be evaluated over the solid angle corresponding to the  
 114 detection numerical aperture  $\Omega_{NA}$  (i.e. of the lens in the sample arm). Combining terms, we expand  
 115 Supplementary Eq. 1b as:

116 
$$x(z_b) \propto Re \left\{ \int_{\Omega_{NA}} \sum_i \gamma(\vec{q} \cdot \vec{r}_i) e^{i\vec{q} \cdot \vec{r}_i} \frac{f(\theta,\varphi)}{kR} d\Omega \right\} \quad (5)$$

117 Only particles within the coherence volume  $V_c$  contribute to the signal. The axial dimension of this  
 118 cylindrical volume is in the order of the coherence length, the lateral radius in the order of the probe beam  
 119 waist when evaluated at the focus position. Sugita et al [Ref 15 of the manuscript] derived the following  
 120 expression to which we adhere:

121 
$$V_c = \frac{4\pi\omega_0^2 \sqrt{2\ln(2)} L_c}{6} \quad (6)$$

122 Where  $L_c$  is the coherence length and  $\omega_0$  the 1/e intensity waist of the illuminating beam. We use this to  
 123 make a further simplification of Supplementary Eq. 5 by assuming that only particles within  $V_c$   
 124 contribute with equal weight to the OCT signal. Therefore we can omit the complex coherence function if  
 125 we sum only over these N particles:

126

$$x(z_b) \propto \text{Re} \left\{ \int_{\Omega_{NA}} \sum_{i=1}^N e^{i\vec{q} \cdot \vec{r}_i} \frac{f(\theta, \varphi)}{kR} d\Omega \right\} \quad (7)$$

127 where  $N = \rho V_C$  and  $\rho$  is the average particle density (constant for the homogeneous medium assumed  
128 here).

129

130

131 **V – mean squared real OCT signal  $\langle x^2(z) \rangle$**

132 Starting with Supplementary Eq. 7 for the real part of the OCT signal we write the mean square of the real  
 133 OCT signal as:

134 
$$\langle x(z_b)^2 \rangle \propto Re \left\{ \int_{\Omega_{NA}} \langle \sum_{i=1}^N \sum_{j=1}^N \frac{f^2(\theta, \varphi)}{k^2 R^2} e^{i\vec{q} \cdot \vec{r}_i} e^{-i\vec{q} \cdot \vec{r}_j} \rangle d\Omega \right\} \quad (8)$$

135 This equation can be further simplified by using the definition of the differential scattering cross section  
 136 of the (identical) particles,  $\sigma_{scat}(\theta, \varphi) = f(\theta, \varphi)^2 / k^2$  [Ref 22 of the manuscript] which can be taken out  
 137 of the ensemble average. Further, the integration over solid angle can be written in spherical coordinates,  
 138 yielding:

139 
$$\langle x(z_b)^2 \rangle \propto Re \left\{ \int_0^{2\pi} \int_{(\pi-NA)}^{\pi} \sigma_{scat}(\theta, \varphi) \langle \sum_{i=1}^N \sum_{j=1}^N e^{i\vec{q} \cdot \vec{r}_i} e^{-i\vec{q} \cdot \vec{r}_j} \rangle \sin\theta d\theta d\varphi \right\} \quad (9)$$

140 For spherical particles as considered here, the differential scattering cross section does not depend on the  
 141 azimuthal angle  $\varphi$ , and the integral over  $\varphi$  simply yields a factor  $2\pi$ .

142 The double sum within chevrons  $\langle \dots \rangle$  accounts for all phase differences between the particles contributing  
 143 to the signal and is known from statistical physics as the structure factor.<sup>5</sup> More precisely:

144 
$$S(q) = \frac{1}{N} \langle \sum_{i=1}^N \sum_{j=1}^N e^{i\vec{q} \cdot \vec{r}_i} e^{-i\vec{q} \cdot \vec{r}_j} \rangle \quad (10)$$

145 Using  $N = \rho V_C$  from SI-IV where  $V_C$  is the coherence volume and  $\rho$  is the average particle density and  $q$   
 146 is the scattering vector with magnitude  $2k \sin \frac{1}{2} \theta$  (see SI-IV). Consequently, the structure factor may be  
 147 written as function of  $\theta$  for convenience. Thus, and since both the differential cross section and structure  
 148 factor are real numbers:

149 
$$\langle x(z_b)^2 \rangle = \sigma_x^2(z_b) \propto \rho V_C \times 2\pi \int_{(\pi-NA)}^{\pi} \sigma_{scat}(\theta) S(\theta) \sin\theta d\theta \quad (11)$$

150 The equality holds based on Supplementary Eq. 3.

151 The structure factor quantifies the effect of organization of scatters in the sample on the scattering pattern  
 152 (hence its name). For discrete random media, it is closely related to the pair-correlation  $g(\Delta r)$  function  
 153 through a Fourier transform relationship:

154 
$$S(q) = 1 + \rho \int g(\Delta r) e^{i\vec{q} \cdot \Delta \vec{r}} d\Delta \vec{r} \quad (12)$$

155 Where the pair-correlation function is interpreted the distribution of particle separations  $\Delta r$ . Note that both  
 156 the pair-correlation function and structure factor are functions of particle density  $\rho$ . Supplementary Eq. 11  
 157 demonstrates that the variance of the real OCT signal  $\sigma_x^2$  and therefore by Supplementary Eq. 2B also the  
 158 mean  $\langle A \rangle$  and variance  $\sigma_A^2$  of the OCT amplitude signal encode the scattering strength of the particles  
 159 (differential cross section term) and the particle density and organization (structure factor term).

160

161



162 **VI – interpretation as optical coefficient**

163 To facilitate interpretation of Supplementary Eq. 11, we first note the definitions<sup>4</sup> of the (total) scattering  
164 cross section (units [m<sup>2</sup>]) of a single spherical particle (Supplementary Eq. 13) and scattering coefficient  
165 (units [m<sup>-1</sup>]) of a medium containing such particles (Supplementary Eq. 14):

166 
$$\sigma_{scat} = 2\pi \int_0^\pi \sigma_{scat}(\theta) \sin\theta d\theta \quad (13)$$

167 
$$\mu_s = \rho\sigma_{scat} \quad (14)$$

168 Comparing Supplementary Eqs 11 and 13, we find that the integral is weighted with the dimensionless  
169 structure factor to account for organization in the sample. Moreover, integral boundaries are limited to the  
170 detection NA, which leads to the following cross section and coefficient ‘in the backscatter direction,  
171 within the detection NA’:

172 
$$\sigma_{b,NA} = 2\pi \int_{(\pi-NA)}^\pi \sigma_{scat}(\theta) S(\theta) \sin\theta d\theta \quad (15)$$

173 
$$\mu_{b,NA} = \rho\sigma_{b,NA} \quad (16)$$

174

175 Thus, at a given location in the sample, the variance of the real part of the OCT signal  $\sigma_x^2$  and the  
176 variance of the envelope signal are proportional to  $\mu_{b,NA}$  ; the mean amplitude  $\langle A \rangle$  is proportional to  
177  $\sqrt{\mu_{b,NA}}$ .

178

179

180 **VI – OCT amplitude vs. depth.**

181 The numerical aperture in Supplementary Eq. 15 could theoretically be expanded to collect *all* scattered  
 182 light. In that case, the expressions for the scattering cross section and scattering coefficient of the discrete  
 183 random medium become:

184 
$$\sigma_{scat,medium} = 2\pi \int_0^\pi \sigma_{scat,particle}(\theta) S(\theta) \sin\theta d\theta \quad (17)$$

185 
$$\mu_{s,medium} = \rho 2\pi \int_0^\pi \sigma_{scat,particle}(\theta) S(\theta) \sin\theta d\theta \quad (18)$$

186 With subscripts ‘medium’ and ‘particle’ added for emphasis but omitted henceforth.

187 In SI-I to SI-V it was assumed that the reference arm is matched to a reference particle at arbitrary depth  
 188  $z_b$ , and that under the 1<sup>st</sup> Born approximation, all particles within the coherence volume  $V_C$  around  $z_b$   
 189 experience the same input field. The amplitude of this illuminating field however decreases in amplitude  
 190 with increasing  $z_b$  because of losses due to light scattering and absorption (the latter is neglected in the  
 191 analysis in this SI). Likewise, part of the light scattered from  $V_C$  is scattered on the way back to the  
 192 sample boundary; it is assumed that this light escapes the detection NA and does not contribute. In other  
 193 words, only single scattered light is considered, for which the attenuation of intensity can be described by  
 194 the Lambert-Beer law, with the  $\mu_s$  of Supplementary Eq. 18 as exponential decay constant. Additional  
 195 depth-dependent weighting terms exist, such as the confocal point spread function (the illuminating field  
 196 will be weaker if the reference particle is chosen outside the focal region) and, specifically for Spectral  
 197 Domain OCT, the sensitivity-rolloff in depth. For a thorough discussion of these factors we refer to our  
 198 earlier work [6] and references therein.

199 In a *Time-Domain system*, the moving reference arm would vary the probe depth  $z_b$  and the coherence  
 200 volume around it to build up an A-line. In this case, the subscript ‘b’ may be dropped and the OCT A-  
 201 line, defined as  $\langle A(z) \rangle$  and variance  $\sigma_A^2(z)$  are written as:

202 
$$\langle A(z) \rangle_{TD} = \sqrt{\alpha_{TD}(z) \frac{\pi}{2} \mu_{b,NA} V_C \exp(-2\mu_s z)} \quad (19)$$

203 
$$\sigma_A^2(z)_{TD} = \alpha_{TD}(z) \left(2 - \frac{\pi}{2}\right) \mu_{b,NA} V_C \exp(-2\mu_s z) \quad (20)$$

204 Were depth  $z$  is measured from the sample boundary. Here  $\mu_s$  is given by Supplementary Eq. 18, and  $\mu_{bNA}$   
 205 by the analysis SI-IV. The factor 2 in accounts for scattering losses to and from the coherence volume.  
 206 The term  $\alpha_{TD}(z)$  accounts for scaling factors such as power-to-current efficiency of the detector, but also  
 207 depth dependent losses, most notably the confocal point spread function – either using a static focus or  
 208 dynamic focusing. Importantly,  $\alpha_{TD}(z)$  only contains parameters related to the OCT system (not the  
 209 sample) and can thus in principle be calibrated to allow for absolute measurements of  $\mu_{bNA}$ .

210 In a *Spectral-Domain system* the zero-delay position is usually not located within the sample but at some  
 211 position outside. This does not change our analysis since it will only lead to a fixed phase difference  
 212 between zero delay and the reference particle. Particles will contribute to the signal as long as the distance  
 213 between zero-delay and the reference particle is within the instantaneous coherence length of the system,  
 214 which is determined by the spectral resolution. We therefore only slightly modify Supplementary Eqs. 19  
 215 and 20:

216 
$$\langle A(z) \rangle_{SD} = \sqrt{\alpha_{SD}(z) \frac{\pi}{2} \mu_{b,NA} V_C \exp(-2\mu_s(z - z_0))} \quad (21)$$

217 
$$\sigma_A^2(z)_{SD} = \alpha_{SD}(z) \left(2 - \frac{\pi}{2}\right) \mu_{b,NA} V_c \exp(-2\mu_s(z - z_0)) \quad (22)$$

218 Were depth  $z$  is measured from zero-delay; and  $z_0$  is the distance between zero-delay and the sample  
219 boundary. The term  $\alpha_{SD}(z)$  accounts for scaling factors such as power-to-current efficiency of the  
220 detector, but also depth dependent losses, most notably the confocal point spread function and sensitivity  
221 roll-off with depth inherent to SD-OCT systems. Again,  $\alpha_{SD}(z)$  only contains parameters related to the  
222 OCT system (not the sample) and can thus in principle be calibrated to allow for absolute measurements  
223 of  $\mu_{bNA}$ .

224

225

226 **VII – scaling of optical properties with volume fraction**

227 Figure SI-4 shows the volume fraction-dependent (Eq. 9 and Eq. 10) and volume fraction-independent  
 228 calculations for  $\mu_{B,NA}, \mu_s, \mu_{B,NA}/\mu_s$ , anisotropy as a function of optical size ( $D \cdot k_0$ ). For the latter calculations  
 229 the structure factor is set to unity. Thus, the  $f_v$ -independent  $\mu_{B,NA}/\mu_s$  and anisotropy curves do not change  
 230 with volume fraction. For the  $f_v$ -dependent calculation all shown plots change with volume fraction since  
 231 the structure factor, which serves as a weighting factor on the angular scattering pattern (phase function)  
 232 is a function of  $f_v$ . (see also SI-VIII).

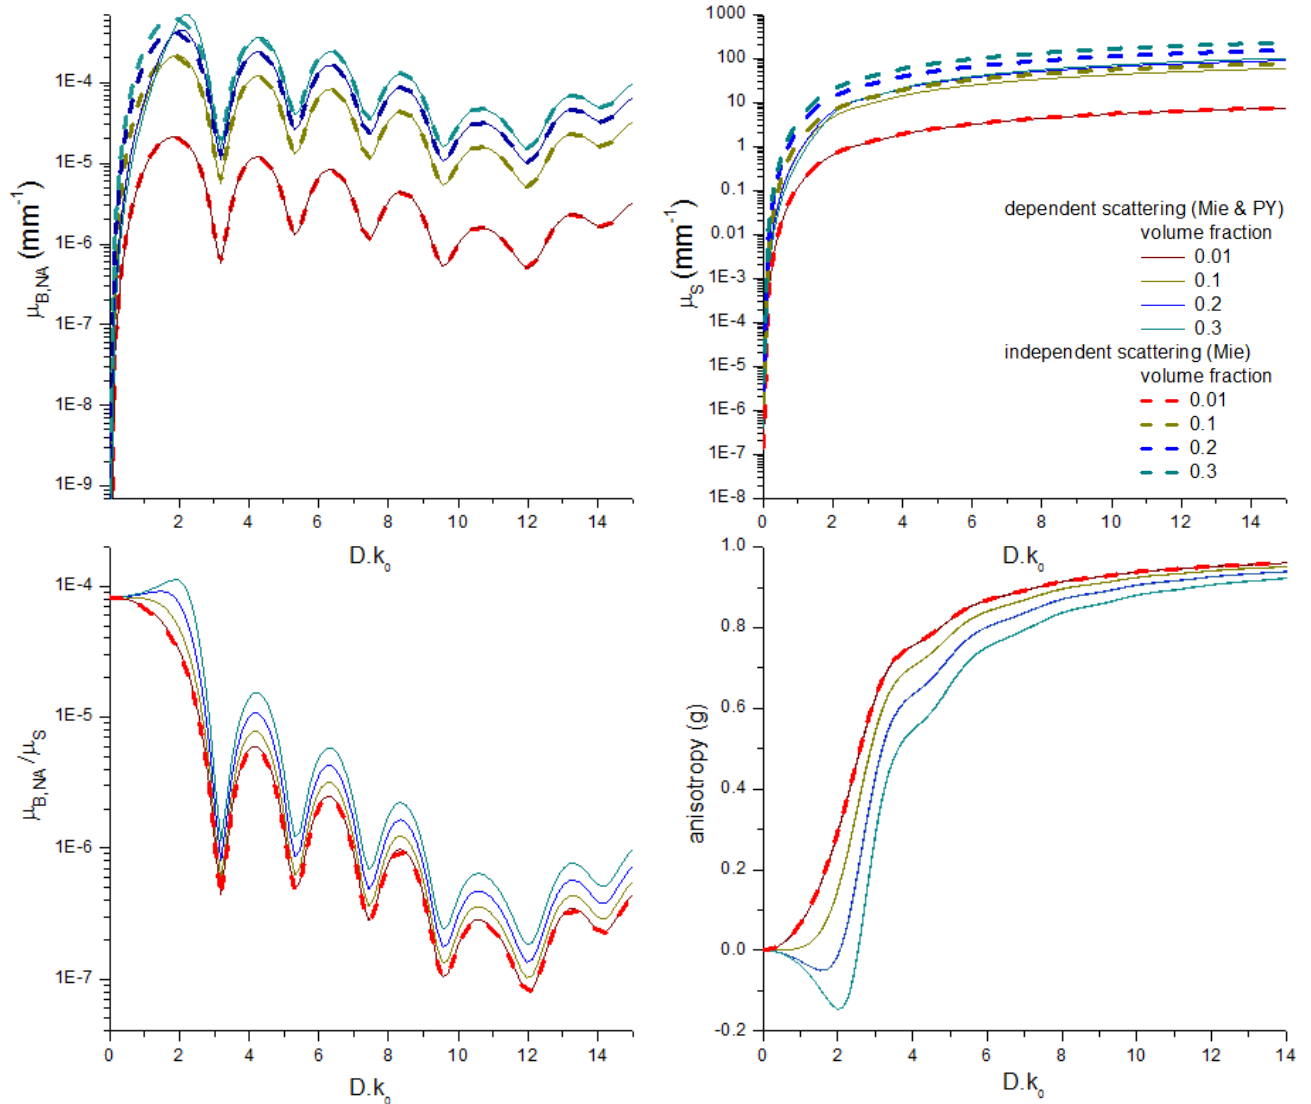

233  
 234 *Figure SI-4: Calculated backscattering coefficient ( $\mu_{B,NA}$ ) (and scattering coefficient ( $\mu_s$ ),*  
 235  *$\mu_{B,NA}/\mu_s$  and anisotropy as a function of optical particle diameter ( $D \cdot k_0$ ,  $k_0 = 2\pi/\lambda_{0,vacuum}$ )*  
 236 *for volume fractions of 0.01, 0.1, 0.2 and 0.3 for a center wavelength  $\lambda_0 = 1300$  and*  
 237 *bandwidth of  $\Delta\lambda = 100$  nm. The solid lines are depict the concentration-dependent*  
 238 *calculation using Eq.11 and Eq. 12. The dotted lines show the concentration-independent*  
 239 *calculations, these are the MIE solutions. For these calculations the structure factor  $S(\theta)$*   
 240 *in Eq. 11 and 12 is set to unity.*

241 **VIII – phase function change with concentration/volume fraction**

242 Our analysis accounts for the phase differences between the fields scattered by the individual particles in  
 243 the sample. This analysis gives rise to a *structure factor* (see SI-V and Supplementary Eq. 10) that  
 244 directly influences the angular light scattering (compare Supplementary Eqs. 13 and 15).

245 Applied to the low-NA backscattering geometry as described in our experiments ( $NA=0.02$ ;  $\theta_{NA} \sim 1^\circ$ ), for  
 246 increasing volume fraction the NA-integrated part of the backscattered intensity increases approximately  
 247 linearly with volume fraction, whereas the total scattered fraction decreases with volume fraction [6].

248 The effect of the structure factor on angular scattering is illustrated below ( $D=0.91 \mu m$ ;  $\lambda_0= 1300 nm$ ;  $n_{part}$   
 249  $= 1.425$ ;  $n_{med} = 1.324$ ). We calculate the phase function, which by definition is normalized on the full  
 250 solid angle. Blue curves show the phase function without inclusion of a structure factor calculated as:

251 
$$p_{Mie}(\theta) = \frac{\sigma_s(\theta)}{2\pi \int_0^\pi \sigma_s(\theta) \sin\theta d\theta} \quad (23)$$

252 Where  $\sigma_s(\theta)$  is the differential scattering cross section for a single particle obtained with Mie theory. Red  
 253 curves show the phase function when the structure factor is included:

254 
$$p_{Mie-PY}(\theta) = \frac{\sigma_s(\theta)S(\theta)}{2\pi \int_0^\pi \sigma_s(\theta)S(\theta) \sin\theta d\theta} \quad (24)$$

255 Where  $S(\theta)$  is the Percus-Yevick structure factor appropriate for Discrete Random Media.<sup>5,7</sup> All blue  
 256 curves are identical. For the red curves (including the structure factor), with increasing volume fraction  
 257 the amplitude of the phase function in the forward direction decreases, the amplitude in the backward  
 258 direction increases, and the overall shape of the phase function becomes broader. This corresponds to a  
 259 decrease of scattering anisotropy  $g$  (the average cosine of the scattering angle) as is also observed in SI-  
 260 VII, Figure SI-4.

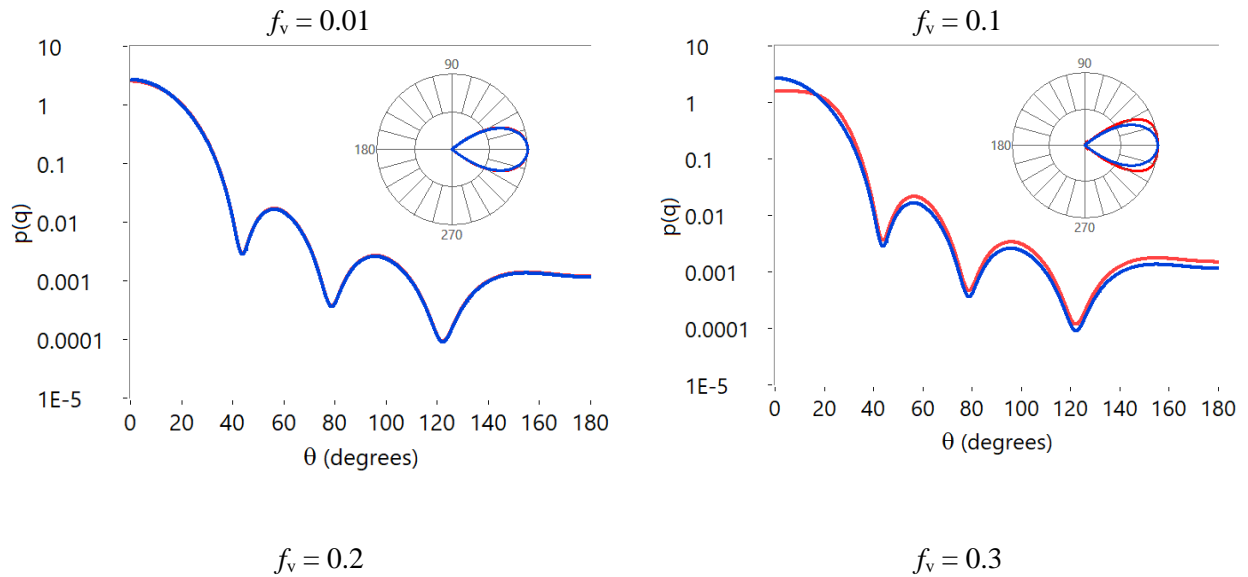

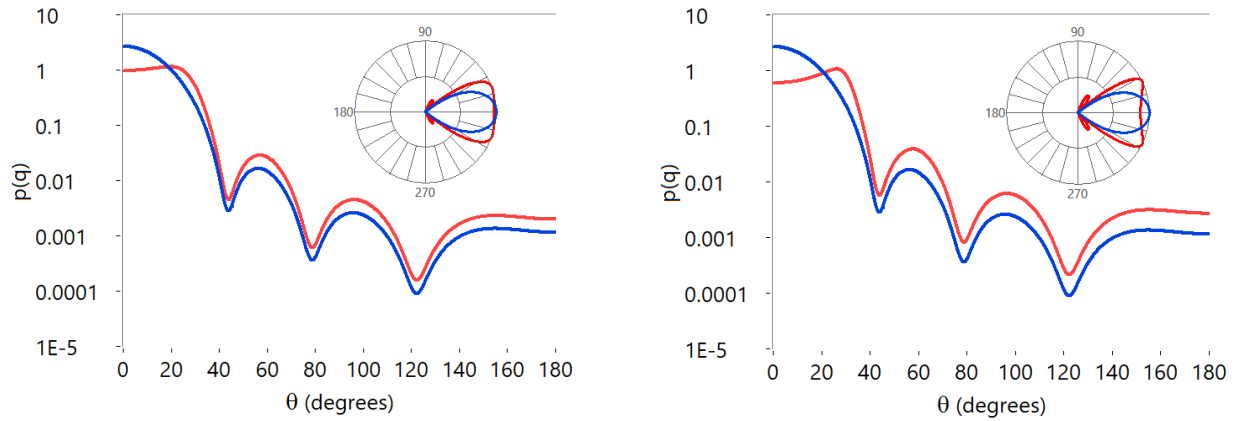

261

262 *Figure SI-5: The phase function [<sup>4</sup>] (scattered intensity normalized on solid angle) is*  
 263 *calculated for volume fractions of 0.01, 0.1, 0.2 and 0.3. using Mie theory ( $D=0.91 \mu\text{m}$ ;*  
 264  *$\lambda_0= 1300 \text{ nm}$ ;  $n_{\text{part}} = 1.425$ ;  $n_{\text{med}} = 1.324$ ) without (blue curves) and including the*  
 265 *structure factor (red curves) as calculated from the Percus Yevick approximation. Note*  
 266 *that our experiments did not exceed volume fractions of 0.06.*

267

268

269

270

271

272

273 **IX – region of interest selection for speckle distribution analysis**

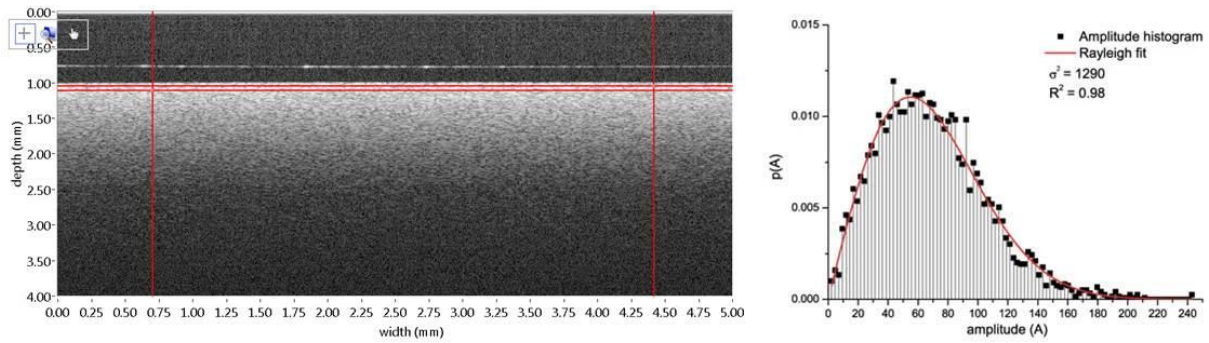

274

275 *Figure SI 6: Region of interest selection for amplitude distribution analysis. Left panel shows an OCT B-*  
276 *scan of a sample. The area between the four red lines is the region of interest from which the distribution*  
277 *of the amplitude, and the mean, variance and contrast are obtained. The right panel shows the histogram*  
278 *of the amplitude distribution from the region of interest plotted in the left panel. The amplitude*  
279 *distribution is fitted with a Rayleigh distribution (Eq. 3 of the manuscript), for which the values for the  $R^2$*   
280 *and variance ( $\sigma^2$ ) are given.*

281

282 **References**

- 283 1. J. W. Goodman, *Speckle Phenomena in Optics: Theory and Applications*, Roberts and Company  
284 Publishers, Greenwood Village (2007).
- 285 2. T. R. Hillman et al., “Correlation of static speckle with sample properties in optical coherence  
286 tomography,” *Opt. Lett.* **31**(2), 190 (2006).
- 287 3. B. Karamata et al., “Speckle statistics in optical coherence tomography SPECKLES IN OPTICAL  
288 COHERENCE,” 593–596 (2005).
- 289 4. H. C. van der Hulst, *Light scattering by small particles*, Dover publications, New York (1957).
- 290 5. J.-P. Hansen and I. R. McDonald, *Theory of simple liquids*, Elsevier (1990).
- 291 6. M. Almasian et al., “Validation of quantitative attenuation and backscattering coefficient  
292 measurements by optical coherence tomography in the concentration- dependent and multiple  
293 scattering regime,” *J. Biomed. Opt.* **20**(12) (2015).
- 294 7. J. K. Percus and G. J. Yevick, “Analysis of Classical Statistical Mechanics by Means of Collective  
295 Coordinates,” *Phys. Rev.* **110**(1), 1–13 (1958).

296

297

298

299

300

301
